# Supplementary material for: Transcriptome profiling reveals Th2 bias and identifies endogenous itch mediators in poison ivy contact dermatitis
Source: PubMed Central journal article supplement (PMC6675552; doi:10.1172/jci.insight.124497), 2019-07-25
Supplement: jciinsight-4-124497-s051.pdf [file jciinsight-4-124497-s051.pdf]

## SUPPLEMENTARY MATERIALS

### Supplemental figure legends

**Suppl. Fig. 1** Behavioral analysis of oxazolone and urushiol- ACD mouse models. (A) Comparison of scratching behavior towards the nape of the neck after challenge with allergen on days 1, 5 and 9. (B) Quantification of neck scratching behavior of urushiol-challenged mice during the 1<sup>st</sup>, 4<sup>th</sup> and 24<sup>th</sup> hour after the 5<sup>th</sup> challenge. (C) Hindpaw scratching bouts directed towards the cheek in the mouse urushiol ACD check model. (D) Forepaw wiping bouts directed towards the cheek in the urushiol cheek ACD model. n = 6-7 mice/group. \*\*p < 0.01 vs. Veh group.

**Suppl. Fig. 2** Skin pathology analysis of the oxazolone and urushiol mouse ACD models. (A) Representative micrographs of neck skin sections from mice treated with vehicle, oxazolone or urushiol are shown. Skin sections were stained with hematoxylin/eosin (H&E), toluidine or anti-CD3 antibody. The inset shows magnifications from the same picture. (B) Average epidermal skin thickness, spongiosis grading, number of eosinophils, CD3<sup>+</sup> cells, mast cells and mast cell degranulation rate per observation field. Black arrows indicate eosinophils, mast cells or CD3<sup>+</sup> cells in corresponding panels. Red arrows indicate degranulated mast cells. n = 5-8 mice/group. \*\*p < 0.01, # p < 0.05 and ### p < 0.01, NS: no significance.

**Suppl. Fig. 3** Quality control of skin RNA used for whole transcriptome microarray analysis. Skin RNA was extracted by TRIzol plus RNeasy Mini Kit. An electropherogram of a representative skin RNA preparation is illustrated and generated on a TapeStation instrument (Agilent). 18s and 28s bands can be clearly distinguished. The calculated RIN (RNA Integrity Number) is 9.6. FU: fluorescence unit.

**Suppl. Fig. 4** Scatter plot comparing gene expression profiles in the skin of oxazolone and urushiol groups vs. vehicle-treated group. Grey dots indicate genes showing less than two-fold differences.

**Suppl. Fig. 5** KEGG pathway enrichment analysis of oxazolone and urushiol ACD model. The black dotted line indicated p value of 0.05.

**Suppl. Table 1** Taqman probes used in this study.

**Suppl. Table 2** The raw data of scratching behaviors of pharmacological interventions of urushiol and oxazolone model mice.

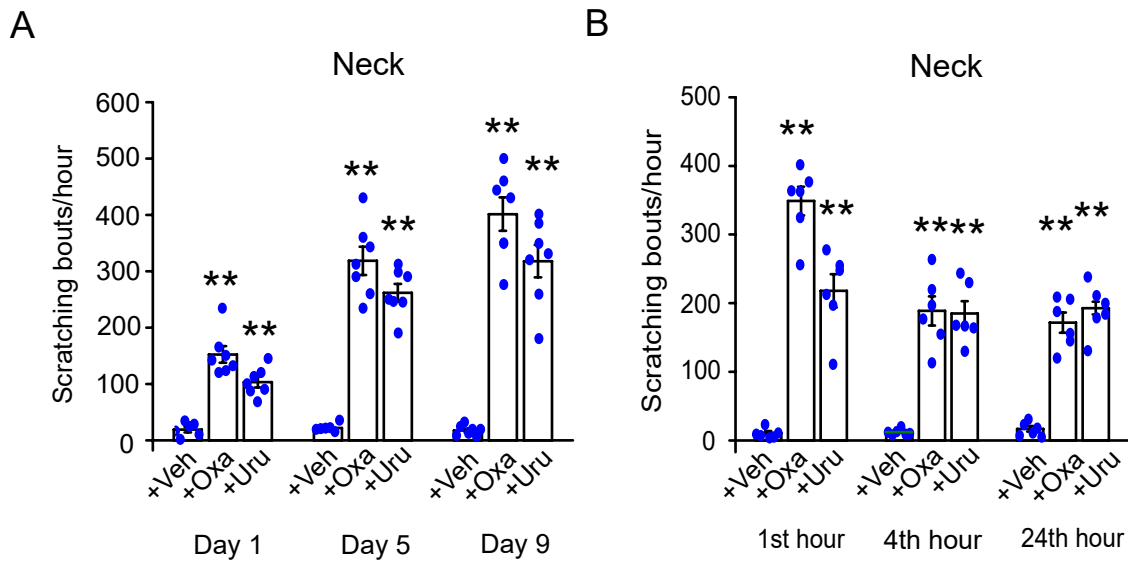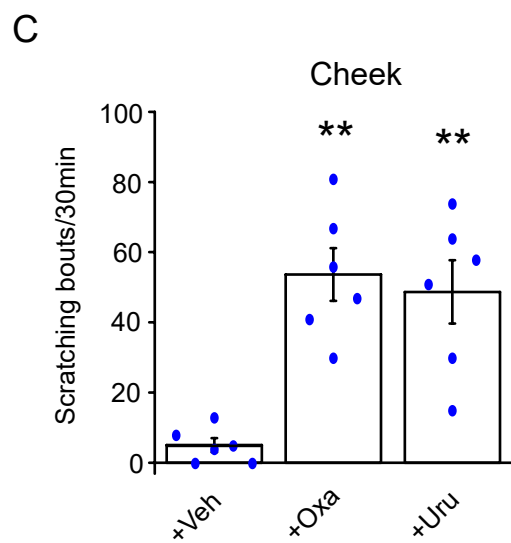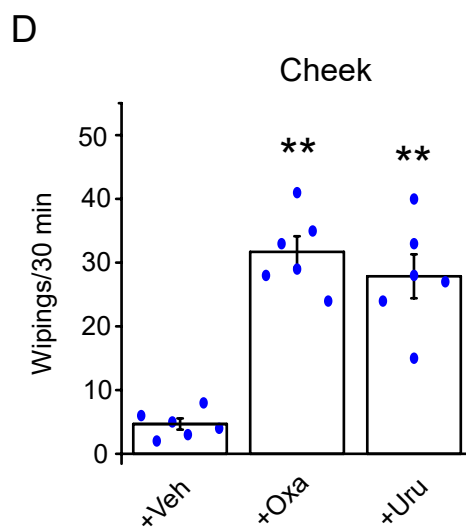

A

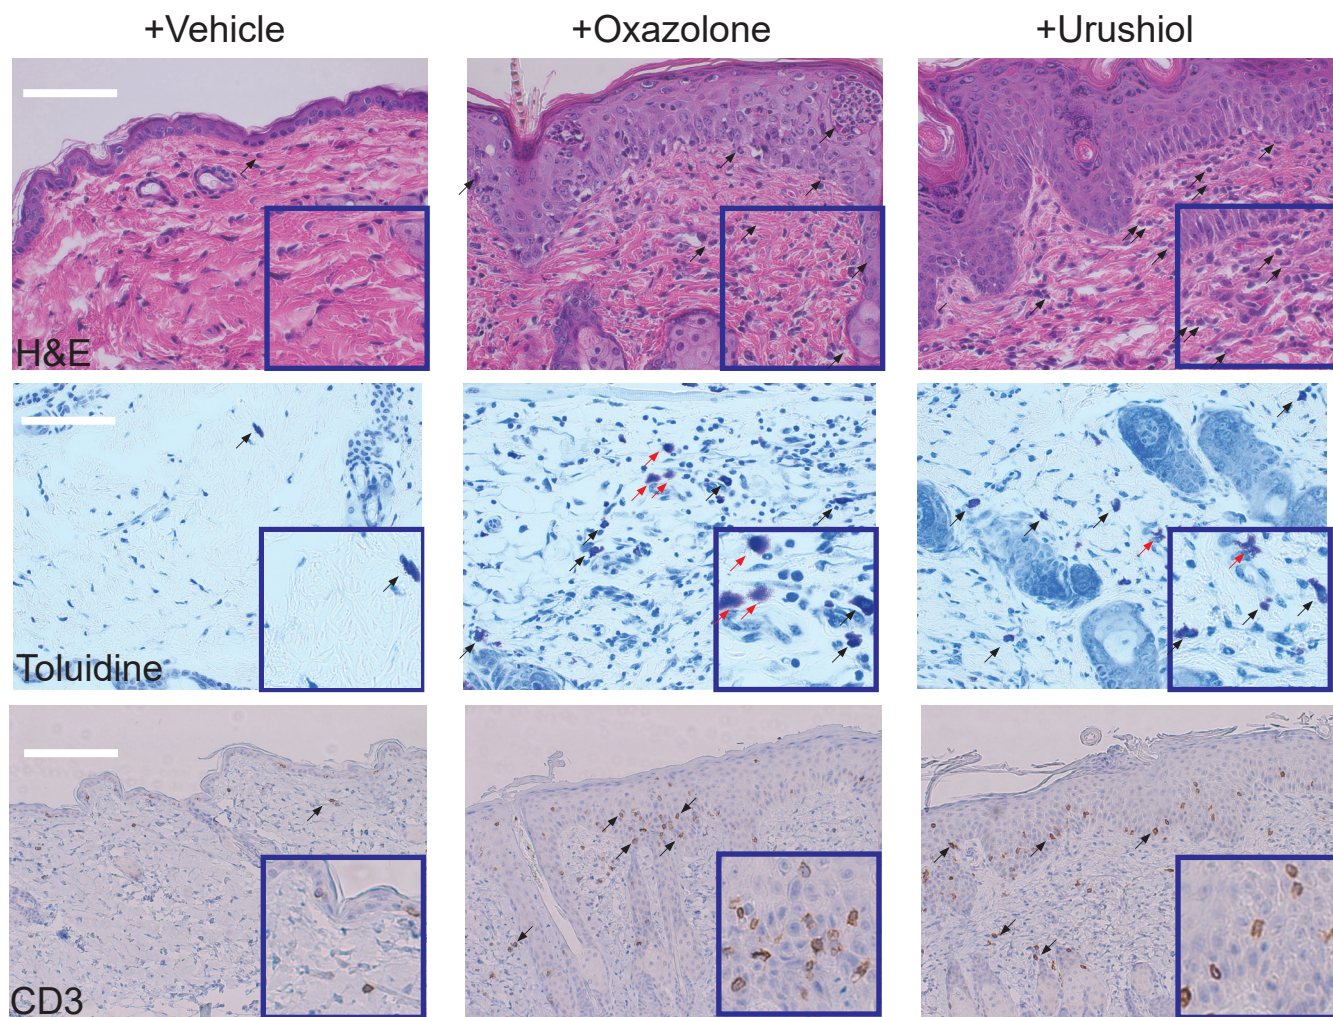

B

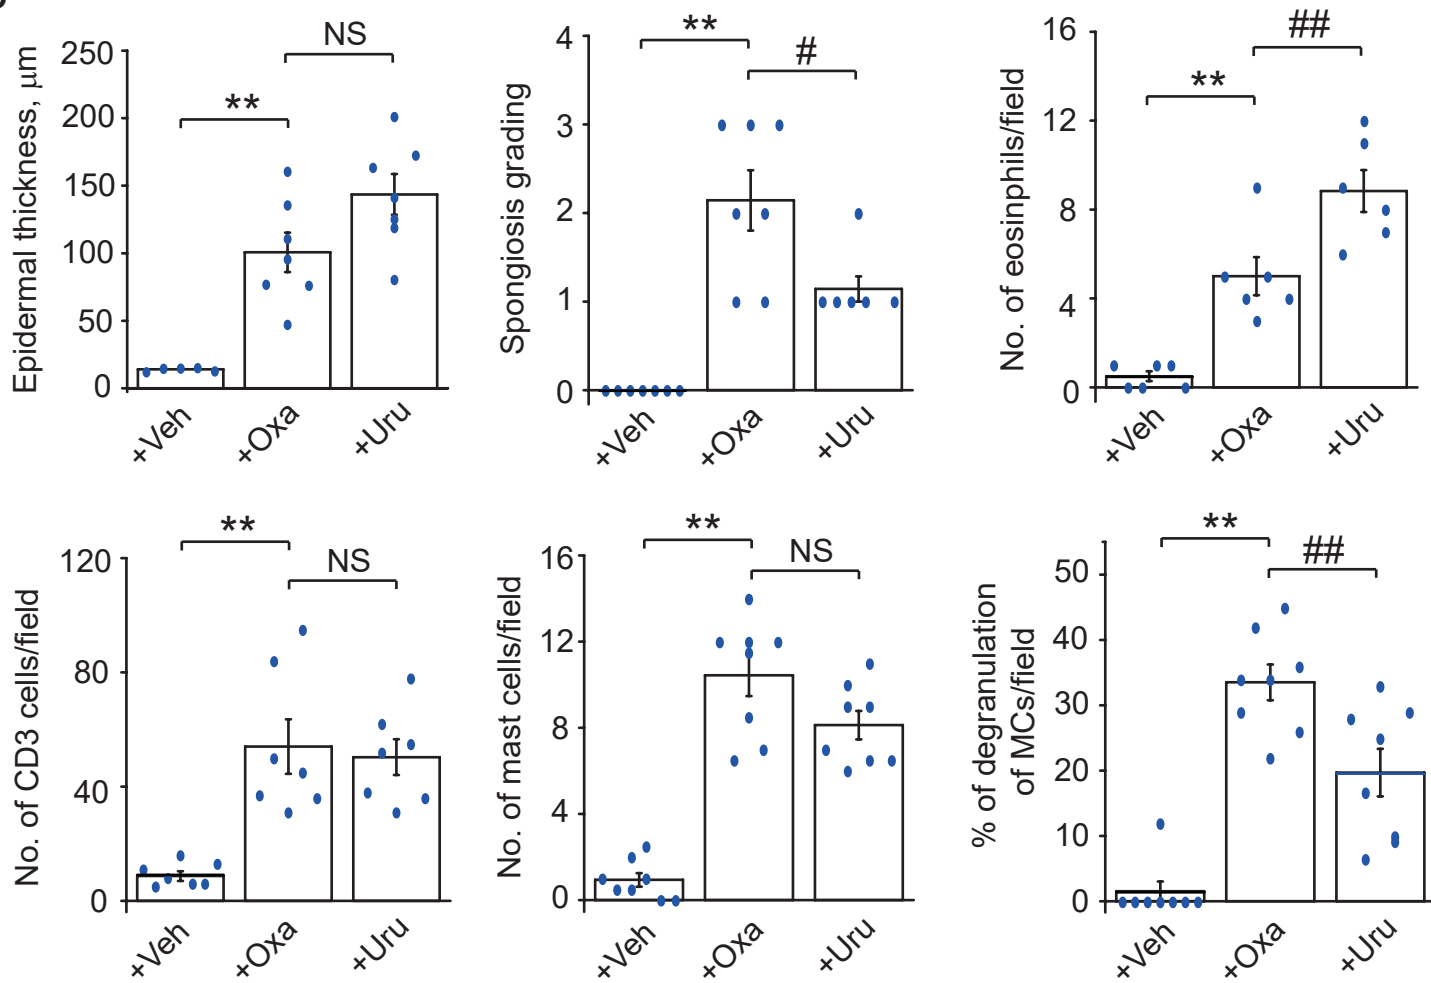

Suppl. Fig. 3

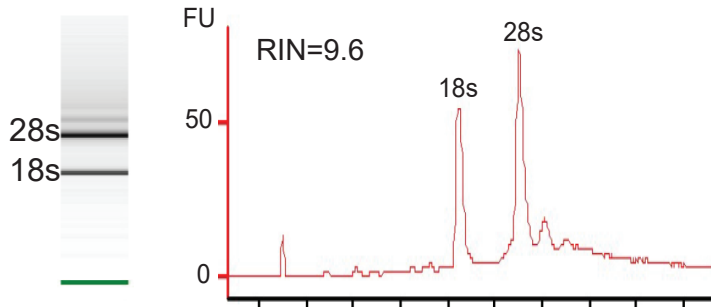

Suppl Fig. 4

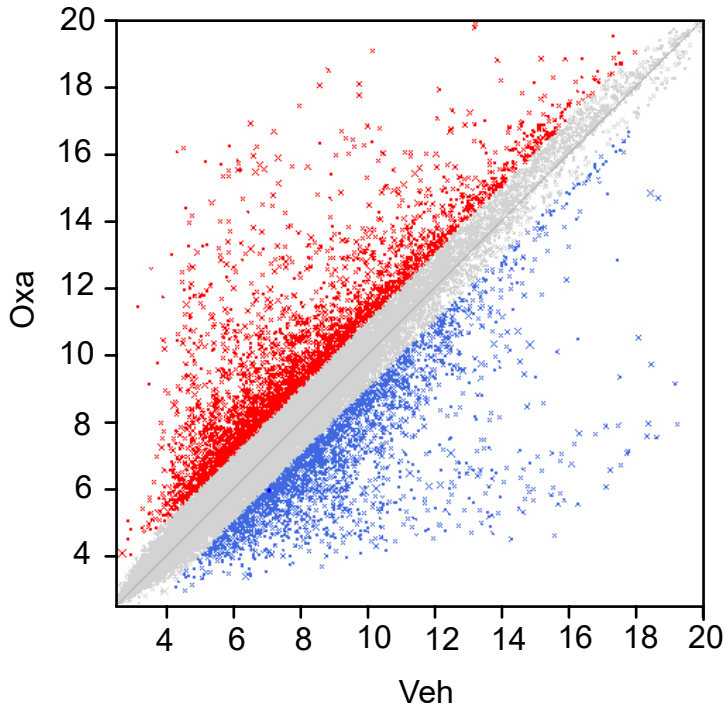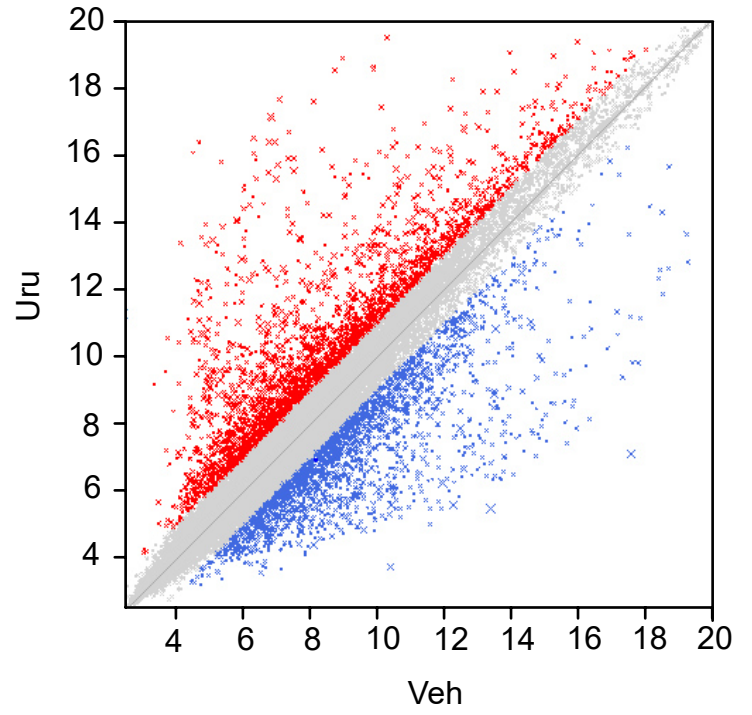

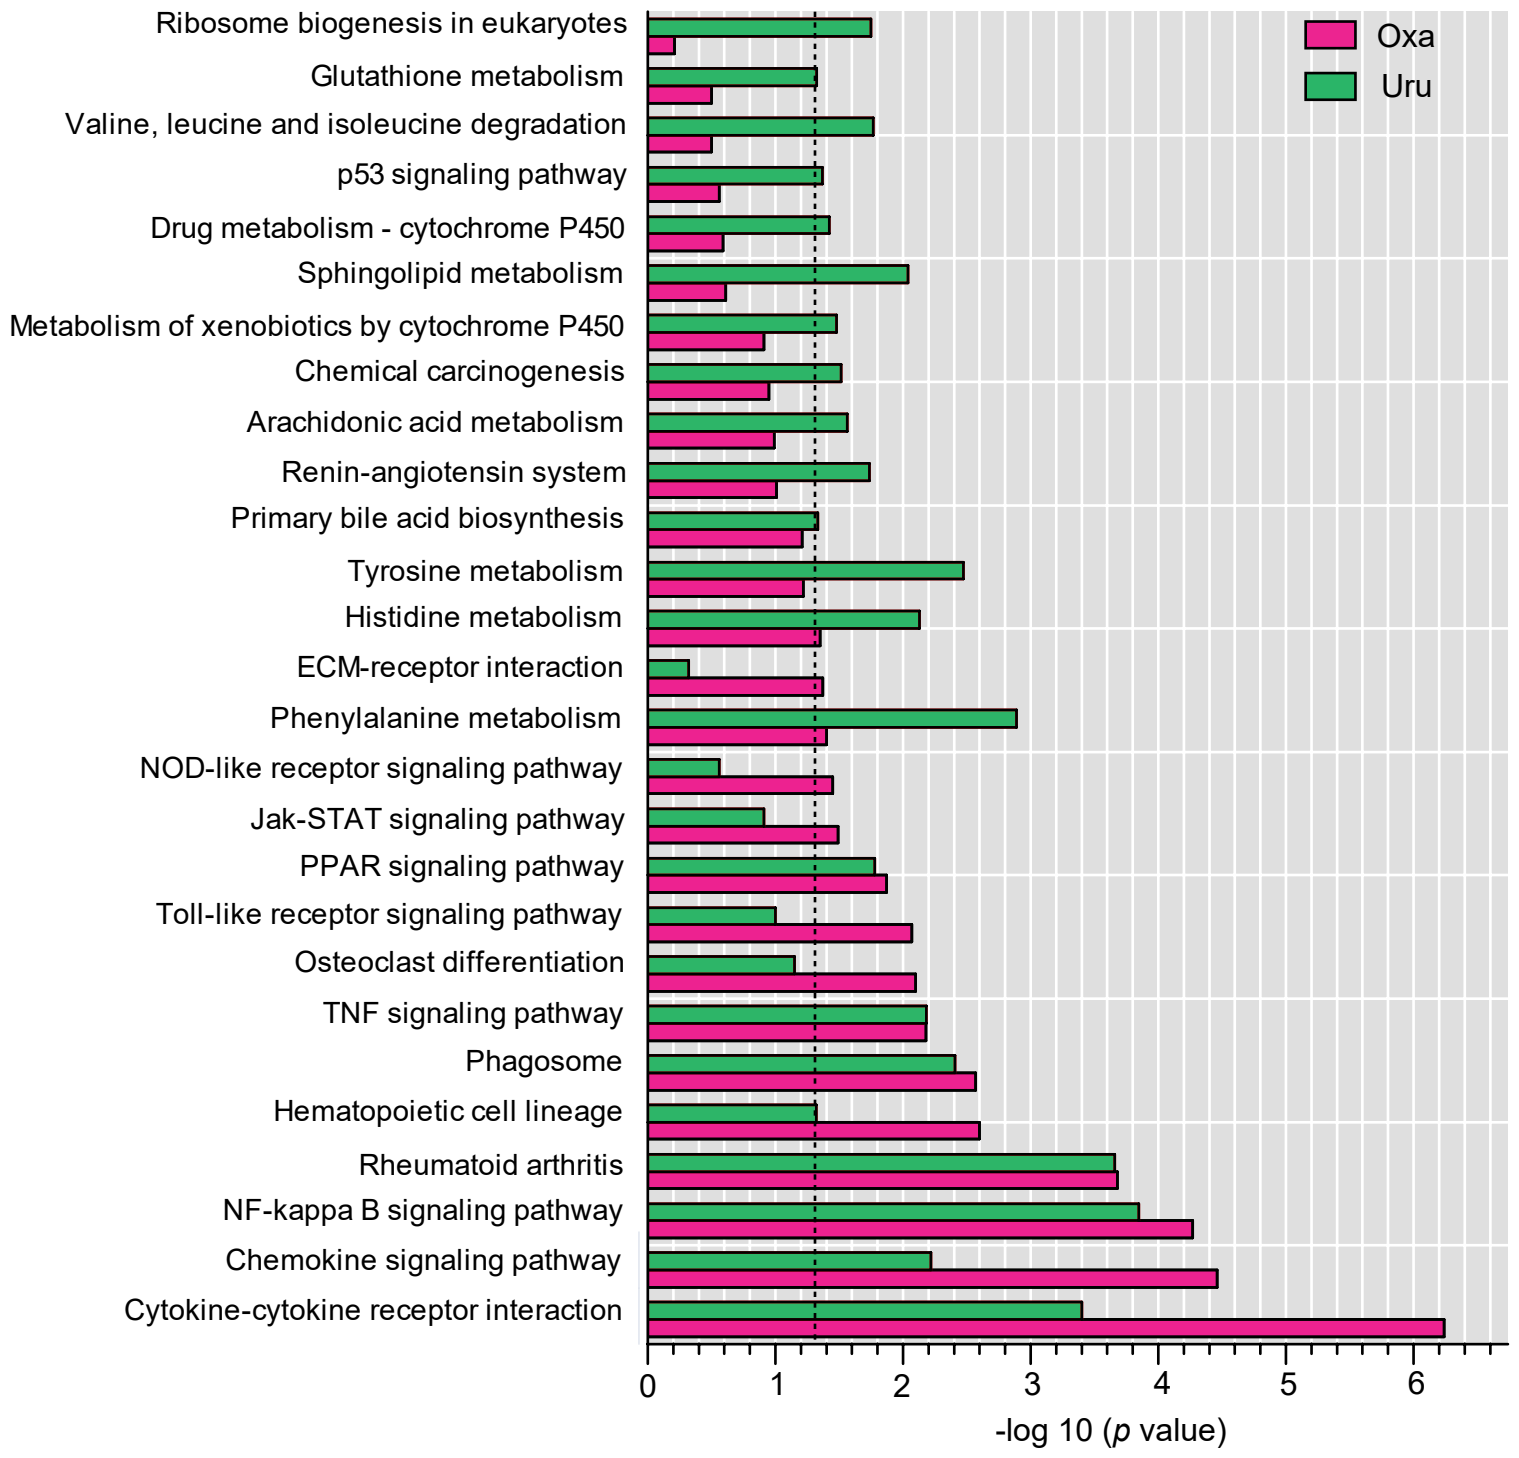

**Table 1:** The gene names and catalog numbers of the Taqman probes used in this study.

|    | Gene name     | Taqman probe         |
|----|---------------|----------------------|
| 1  | Actb          | Mm02619580_g1        |
| 2  | Ifn- $\gamma$ | Mm01168134_m1        |
| 3  | Cxcl9         | Mm00434946_m1        |
| 4  | Cxcl10        | Mm00445235_m1        |
| 5  | Cxcl11        | Mm00444662_m1        |
| 6  | Tnf- $\alpha$ | Mm00443258_m1        |
| 7  | Il-4          | Mm00445259_m1        |
| 8  | Il-10         | Mm00439614_m1        |
| 9  | Il-13         | Mm00434204_m1        |
| 10 | Tslp          | Mm01157588_m1        |
| 11 | Il-33         | Mm00505403_m1        |
| 12 | Ccl17         | Mm01244826_m1        |
| 13 | Ccl5          | Mm01302427_m1        |
| 14 | Il-17f        | Mm00521423_m1        |
| 15 | Il-23a        | Mm01160011_m1        |
| 16 | Ccl20         | Mm01268754_m1        |
| 17 | Lcn2          | Mm01324470_m1        |
| 18 | S100a7        | Mm01218201_m1        |
| 19 | S100a9        | Mm00656925_m1        |
| 20 | Il-1 $\beta$  | Mm00434228_m1        |
| 21 | Il-6          | Mm00446190_m1        |
| 22 | Ccr7          | Mm01301785_m1        |
| 23 | Ccl19         | Mm00839667_m1        |
| 24 | Foxp3         | Mm00475162_m1        |
| 25 | Cxcl1         | Mm04207460_m1        |
| 26 | Cxcl2         | Mm00436450_m1        |
| 27 | Cxcl5         | Mm00436451_m1        |
| 28 | <b>Ngf</b>    | <b>Mm00443039_m1</b> |
| 29 | <b>Mmp-9</b>  | <b>Mm00442991_m1</b> |
| 30 | <b>Crlf2</b>  | <b>Mm00497362_m1</b> |
| 31 | <b>Il4ra</b>  | <b>Mm01275139_m1</b> |
| 32 | <b>Fcer1a</b> | <b>Mm00438867_m1</b> |
